# Supplementary material for: Performance improvement of inverted two-dimensional perovskite solar cells using a non-fullerene acceptor as the trap passivator
Source: Royal Society of Chemistry journal article supplement (doi:10.1039/d1se00192b), 2021-01-01
Supplement: d1se00192b1.pdf [file d1se00192b1.pdf]

## Supporting Information for

# **Performance improvement of inverted two-dimensional perovskite solar cells using a non-fullerene acceptor as the trap passivator**

Zhihai Liu<sup>a</sup> and Eun-Cheol Lee<sup>\*b</sup>

*<sup>a</sup>School of Opto-Electronic Information Science and Technology, Yantai University,*

*Yantai, 264005, China*

*<sup>b</sup>Department of Nano-Physics, Gachon University, Seongnam, 13120, Republic of Korea, Email: elee@gachon.ac.kr*

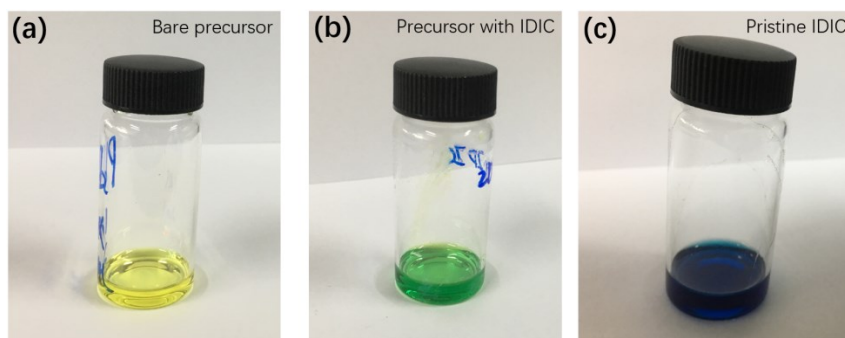

**Fig. S1.** Photographs of (a) bare perovskite precursor; (b) perovskite precursor with IDIC; (c) pristine IDIC solution.

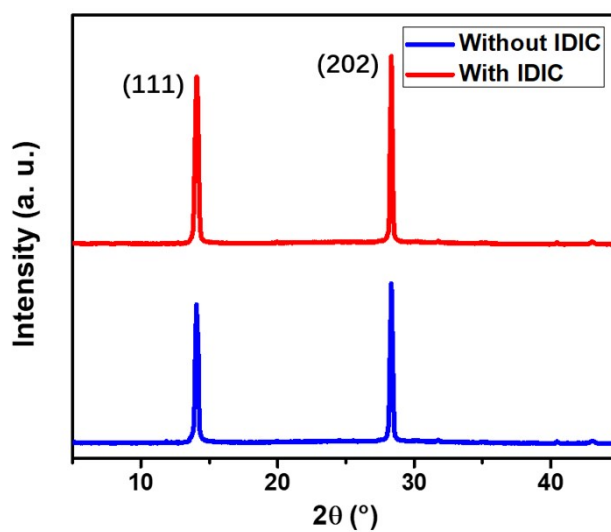

**Fig. S2.** XRD patterns of the perovskite films without and with IDIC.

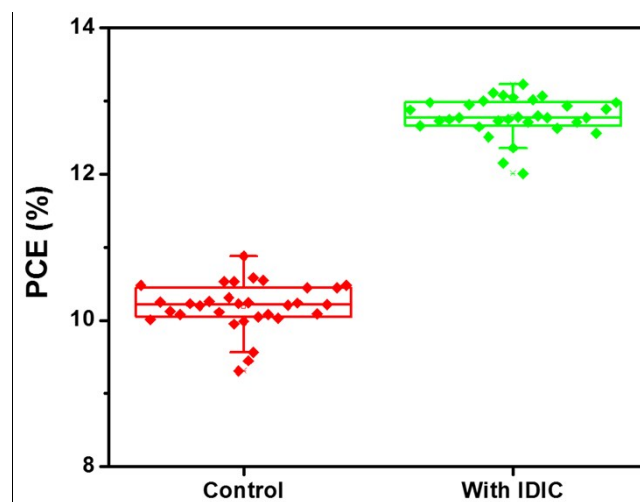

**Fig. S3.** Statistical PCE values for 32 individual PSCs without and with IDIC in the perovskite film.

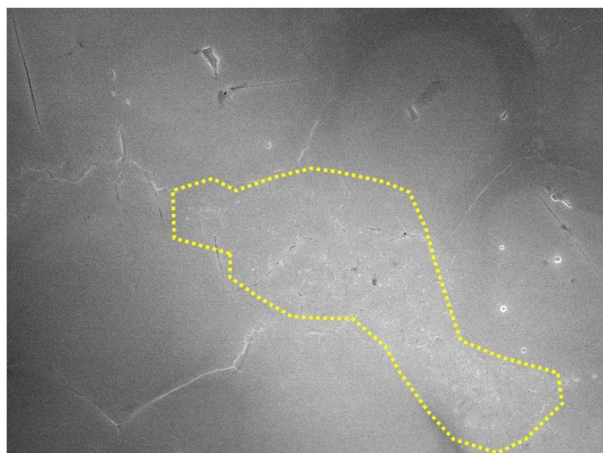

**Fig. S4.** SEM image of an example perovskite film with 2.0 mg mL<sup>-1</sup> of IDIC.

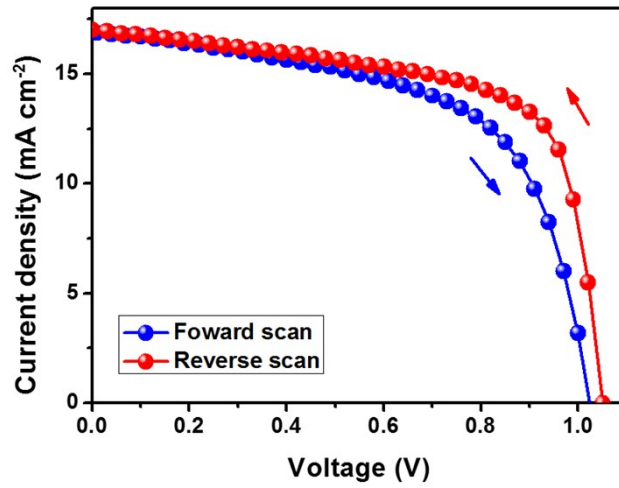

**Fig. S5.** Forward and reverse  $J$ - $V$  characteristics of the reference 2D PSCs without IDIC in the perovskite film.

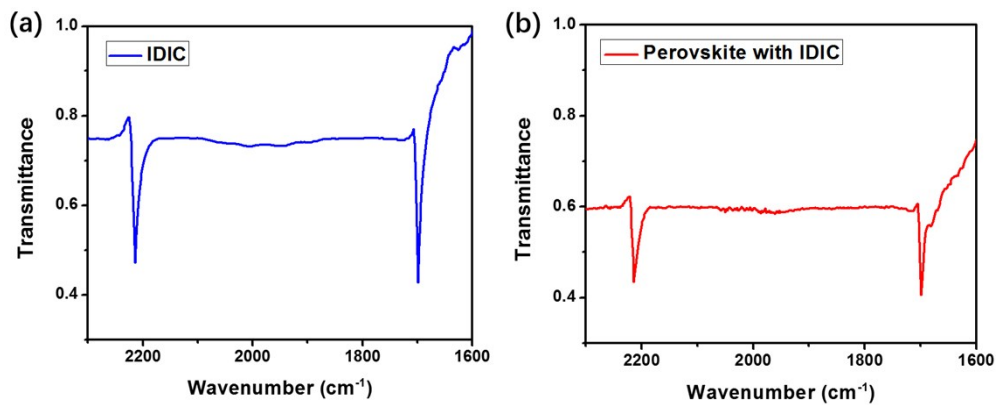

**Fig. S6.** FT-IR spectra of (a) bare IDIC and (b) perovskite with IDIC powders.

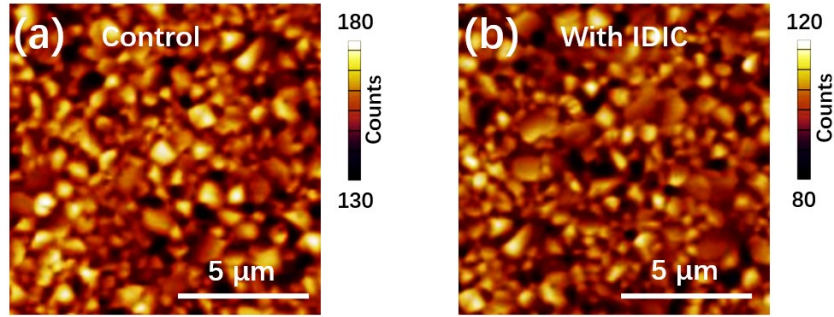

**Fig. S7.** PL maps of bare perovskite (a) and perovskite with IDIC (b) films. The PL signals were generated using a 532 nm laser source at  $2000 \text{ mW cm}^{-2}$ .

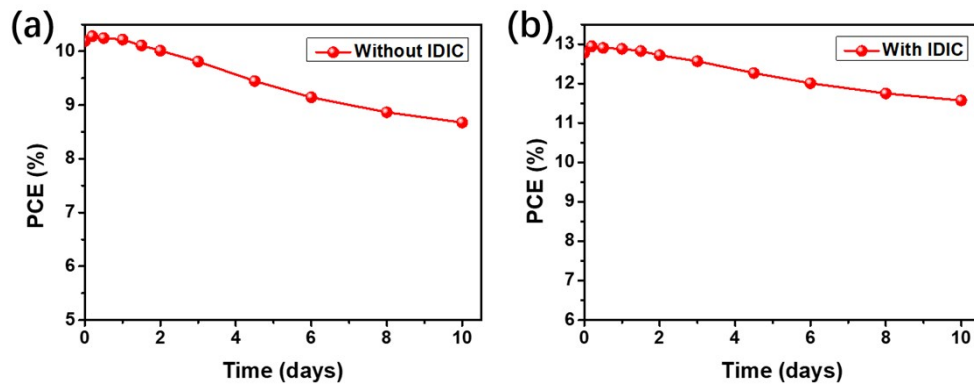

**Fig. S8.** PCE as a function of time for PSCs without (a) and with (b) IDIC.

**Table S1.** Summary of the photovoltaic parameters, for the best sample among the PSCs with IDIC in the perovskite film.

| Scan    | $J_{sc}$ (mA cm <sup>-2</sup> ) | $V_{oc}$ (V) | FF (%) | PCE (%) |
|---------|---------------------------------|--------------|--------|---------|
| Forward | 18.8                            | 1.04         | 67.6   | 13.23   |
| Reverse | 18.8                            | 1.04         | 68.4   | 13.37   |

**Table S2.** Summary of the photovoltaic parameters, for the best reference sample among the PSCs without IDIC in the perovskite film.

| Scan    | $J_{sc}$ (mA cm <sup>-2</sup> ) | $V_{oc}$ (V) | FF (%) | PCE (%) |
|---------|---------------------------------|--------------|--------|---------|
| Forward | 17.3                            | 1.02         | 59.8   | 10.53   |
| Reverse | 17.4                            | 1.04         | 62.7   | 11.34   |
